# Supplementary material for: Analysis of the Thinopyrum elongatum Transcriptome under Water Deficit Stress
Source: Int J Genomics. 2015 Feb 4;2015:265791. doi: 10.1155/2015/265791 (PMC4334436; doi:10.1155/2015/265791)
Supplement: Supplementary file 1 — Enrichment analysis of GO terms in Thinopyrum elongatum under water deficit stress was performed using software topGO. The results showed that GO terms relative to stress were significant, the detail was listed in Supplementary Material. [file 265791.f1.xls]

## Sheet: All
> allRes_BP
GO.ID Term Annotated Significant Expected classicFisher
1 GO:0006412 translation 1379 137 57.05 2.4e-22
2 GO:0010035 response to inorganic substance 228 36 9.43 4.4e-12
3 GO:1901700 response to oxygen-containing compound 137 27 5.67 1.1e-11
4 GO:0042221 response to chemical 428 51 17.71 1.1e-11
5 GO:0010038 response to metal ion 178 30 7.36 5.1e-11
6 GO:0070887 cellular response to chemical stimulus 56 16 2.32 5.6e-10
7 GO:0046686 response to cadmium ion 141 25 5.83 6.9e-10
8 GO:0009628 response to abiotic stimulus 874 75 36.16 1.7e-09
9 GO:0071310 cellular response to organic substance 46 13 1.90 2.7e-08
10 GO:0009755 hormone-mediated signaling pathway 39 12 1.61 3.2e-08
11 GO:0032870 cellular response to hormone stimulus 39 12 1.61 3.2e-08
12 GO:0071495 cellular response to endogenous stimulus 39 12 1.61 3.2e-08
13 GO:0055114 oxidation-reduction process 2134 138 88.28 5.5e-08
14 GO:0005975 carbohydrate metabolic process 1285 93 53.16 8.6e-08
15 GO:0001101 response to acid 98 18 4.05 9.6e-08
16 GO:1901701 cellular response to oxygen-containing c... 44 11 1.82 1.2e-06
17 GO:0006970 response to osmotic stress 128 19 5.30 1.3e-06
18 GO:0010467 gene expression 3942 217 163.08 2.1e-06
19 GO:0044710 single-organism metabolic process 4806 256 198.82 2.4e-06
20 GO:0009651 response to salt stress 122 18 5.05 2.7e-06
21 GO:0072593 reactive oxygen species metabolic proces... 26 8 1.08 6.7e-06
22 GO:0010033 response to organic substance 169 21 6.99 7.0e-06
23 GO:0010941 regulation of cell death 14 6 0.58 1.1e-05
24 GO:0043067 regulation of programmed cell death 14 6 0.58 1.1e-05
25 GO:0050896 response to stimulus 3236 180 133.87 1.1e-05
26 GO:0071396 cellular response to lipid 21 7 0.87 1.4e-05
27 GO:0006414 translational elongation 90 14 3.72 1.9e-05
28 GO:0043069 negative regulation of programmed cell d... 10 5 0.41 2.5e-05
29 GO:0060548 negative regulation of cell death 10 5 0.41 2.5e-05
30 GO:0044724 single-organism carbohydrate catabolic p... 160 19 6.62 3.6e-05
31 GO:0016052 carbohydrate catabolic process 175 20 7.24 3.9e-05
32 GO:0042254 ribosome biogenesis 137 17 5.67 5.2e-05
33 GO:0048518 positive regulation of biological proces... 64 11 2.65 5.7e-05
34 GO:0043207 response to external biotic stimulus 76 12 3.14 6.3e-05
35 GO:0051707 response to other organism 76 12 3.14 6.3e-05
36 GO:0006950 response to stress 1934 114 80.01 6.4e-05
37 GO:0071229 cellular response to acid 26 7 1.08 6.7e-05
38 GO:0006952 defense response 89 13 3.68 7.3e-05
39 GO:0009812 flavonoid metabolic process 12 5 0.50 7.4e-05
40 GO:0022613 ribonucleoprotein complex biogenesis 141 17 5.83 7.5e-05
41 GO:0097306 cellular response to alcohol 19 6 0.79 8.4e-05
42 GO:0055085 transmembrane transport 1106 72 45.75 9.1e-05
43 GO:0033993 response to lipid 57 10 2.36 0.00010
44 GO:0098542 defense response to other organism 60 10 2.48 0.00016
45 GO:0044036 cell wall macromolecule metabolic proces... 50 9 2.07 0.00019
46 GO:0009617 response to bacterium 52 9 2.15 0.00025
47 GO:0009738 abscisic acid-activated signaling pathwa... 15 5 0.62 0.00025
48 GO:0071215 cellular response to abscisic acid stimu... 15 5 0.62 0.00025
49 GO:0009313 oligosaccharide catabolic process 4 3 0.17 0.00027
50 GO:0046352 disaccharide catabolic process 4 3 0.17 0.00027
51 GO:0009605 response to external stimulus 217 21 8.98 0.00028
52 GO:0048522 positive regulation of cellular process 53 9 2.19 0.00029
53 GO:0009607 response to biotic stimulus 332 28 13.73 0.00031
54 GO:0009266 response to temperature stimulus 77 11 3.19 0.00031
55 GO:0009845 seed germination 16 5 0.66 0.00036
56 GO:0090351 seedling development 16 5 0.66 0.00036
57 GO:0097305 response to alcohol 55 9 2.28 0.00039
58 GO:0044249 cellular biosynthetic process 4348 220 179.87 0.00043
59 GO:0048513 organ development 80 11 3.31 0.00044
60 GO:0016998 cell wall macromolecule catabolic proces... 45 8 1.86 0.00046
61 GO:0048731 system development 258 23 10.67 0.00048
62 GO:0050832 defense response to fungus 17 5 0.70 0.00049
63 GO:0009813 flavonoid biosynthetic process 10 4 0.41 0.00050
64 GO:0010119 regulation of stomatal movement 10 4 0.41 0.00050
65 GO:0044275 cellular carbohydrate catabolic process 10 4 0.41 0.00050
66 GO:1901576 organic substance biosynthetic process 4495 226 185.95 0.00050
67 GO:0009056 catabolic process 975 62 40.33 0.00052
68 GO:0009620 response to fungus 18 5 0.74 0.00065
69 GO:0009873 ethylene-activated signaling pathway 5 3 0.21 0.00066
70 GO:0071369 cellular response to ethylene stimulus 5 3 0.21 0.00066
71 GO:0000160 phosphorelay signal transduction system 60 9 2.48 0.00076
72 GO:0044085 cellular component biogenesis 352 28 14.56 0.00077
73 GO:0009737 response to abscisic acid 49 8 2.03 0.00083
74 GO:0051130 positive regulation of cellular componen... 19 5 0.79 0.00086
75 GO:0071554 cell wall organization or biogenesis 74 10 3.06 0.00091
76 GO:0006801 superoxide metabolic process 20 5 0.83 0.00110
77 GO:0044765 single-organism transport 1684 95 69.67 0.00116
78 GO:0010154 fruit development 64 9 2.65 0.00122
79 GO:0006979 response to oxidative stress 227 20 9.39 0.00125
80 GO:0009225 nucleotide-sugar metabolic process 6 3 0.25 0.00128
81 GO:0042743 hydrogen peroxide metabolic process 6 3 0.25 0.00128
82 GO:0009059 macromolecule biosynthetic process 3541 180 146.49 0.00137
83 GO:0007155 cell adhesion 21 5 0.87 0.00140
84 GO:0022610 biological adhesion 21 5 0.87 0.00140
85 GO:0050790 regulation of catalytic activity 181 17 7.49 0.00142
86 GO:0032270 positive regulation of cellular protein ... 31 6 1.28 0.00149
87 GO:0051247 positive regulation of protein metabolic... 31 6 1.28 0.00149
88 GO:0006098 pentose-phosphate shunt 42 7 1.74 0.00154
89 GO:0006739 NADP metabolic process 42 7 1.74 0.00154
90 GO:0006740 NADPH regeneration 42 7 1.74 0.00154
91 GO:0042742 defense response to bacterium 42 7 1.74 0.00154
92 GO:0010118 stomatal movement 13 4 0.54 0.00154
93 GO:0006007 glucose catabolic process 152 15 6.29 0.00162
94 GO:0019320 hexose catabolic process 152 15 6.29 0.00162
95 GO:0046365 monosaccharide catabolic process 152 15 6.29 0.00162
96 GO:0044712 single-organism catabolic process 370 28 15.31 0.00163
97 GO:0009725 response to hormone 137 14 5.67 0.00164
98 GO:0005988 lactose metabolic process 2 2 0.08 0.00171
99 GO:0005990 lactose catabolic process 2 2 0.08 0.00171
100 GO:0009226 nucleotide-sugar biosynthetic process 2 2 0.08 0.00171
101 GO:0010253 UDP-rhamnose biosynthetic process 2 2 0.08 0.00171
102 GO:0033478 UDP-rhamnose metabolic process 2 2 0.08 0.00171
103 GO:0000302 response to reactive oxygen species 22 5 0.91 0.00175
104 GO:0065009 regulation of molecular function 185 17 7.65 0.00179
105 GO:0034645 cellular macromolecule biosynthetic proc... 3527 178 145.91 0.00202
106 GO:0009415 response to water 44 7 1.82 0.00203
107 GO:0006730 one-carbon metabolic process 14 4 0.58 0.00209
108 GO:0006984 ER-nucleus signaling pathway 7 3 0.29 0.00218
109 GO:0043086 negative regulation of catalytic activit... 70 9 2.90 0.00230
110 GO:0009743 response to carbohydrate 24 5 0.99 0.00264
111 GO:0009893 positive regulation of metabolic process 46 7 1.90 0.00265
112 GO:0009749 response to glucose 15 4 0.62 0.00275
113 GO:0048584 positive regulation of response to stimu... 15 4 0.62 0.00275
114 GO:0044092 negative regulation of molecular functio... 72 9 2.98 0.00280
115 GO:0048316 seed development 59 8 2.44 0.00284
116 GO:0009058 biosynthetic process 5245 252 216.98 0.00305
117 GO:1901615 organic hydroxy compound metabolic proce... 73 9 3.02 0.00308
118 GO:0009409 response to cold 60 8 2.48 0.00316
119 GO:0014070 response to organic cyclic compound 25 5 1.03 0.00319
120 GO:0009612 response to mechanical stimulus 8 3 0.33 0.00338
121 GO:0009740 gibberellic acid mediated signaling path... 8 3 0.33 0.00338
122 GO:0010476 gibberellin mediated signaling pathway 8 3 0.33 0.00338
123 GO:0071370 cellular response to gibberellin stimulu... 8 3 0.33 0.00338
124 GO:0009793 embryo development ending in seed dorman... 48 7 1.99 0.00339
125 GO:0005996 monosaccharide metabolic process 231 19 9.56 0.00354
126 GO:0009746 response to hexose 16 4 0.66 0.00355
127 GO:0034284 response to monosaccharide 16 4 0.66 0.00355
128 GO:0034976 response to endoplasmic reticulum stress 16 4 0.66 0.00355
129 GO:0051179 localization 2443 127 101.06 0.00367
130 GO:0019318 hexose metabolic process 215 18 8.89 0.00370
131 GO:0006471 protein ADP-ribosylation 26 5 1.08 0.00382
132 GO:0048523 negative regulation of cellular process 50 7 2.07 0.00428
133 GO:0051128 regulation of cellular component organiz... 38 6 1.57 0.00438
134 GO:0006810 transport 2391 124 98.91 0.00444
135 GO:0006449 regulation of translational termination 17 4 0.70 0.00450
136 GO:0006452 translational frameshifting 17 4 0.70 0.00450
137 GO:0008612 peptidyl-lysine modification to hypusine 17 4 0.70 0.00450
138 GO:0009723 response to ethylene 17 4 0.70 0.00450
139 GO:0043243 positive regulation of protein complex d... 17 4 0.70 0.00450
140 GO:0043244 regulation of protein complex disassembl... 17 4 0.70 0.00450
141 GO:0045901 positive regulation of translational elo... 17 4 0.70 0.00450
142 GO:0045905 positive regulation of translational ter... 17 4 0.70 0.00450
143 GO:0046516 hypusine metabolic process 17 4 0.70 0.00450
144 GO:0051234 establishment of localization 2397 124 99.16 0.00482
145 GO:0009404 toxin metabolic process 9 3 0.37 0.00491
146 GO:0009914 hormone transport 9 3 0.37 0.00491
147 GO:0034614 cellular response to reactive oxygen spe... 9 3 0.37 0.00491
148 GO:0060918 auxin transport 9 3 0.37 0.00491
149 GO:0002679 respiratory burst involved in defense re... 3 2 0.12 0.00499
150 GO:0045730 respiratory burst 3 2 0.12 0.00499
151 GO:0050665 hydrogen peroxide biosynthetic process 3 2 0.12 0.00499
152 GO:0052542 defense response by callose deposition 3 2 0.12 0.00499
153 GO:0006006 glucose metabolic process 171 15 7.07 0.00502
154 GO:0002376 immune system process 28 5 1.16 0.00533
155 GO:0018193 peptidyl-amino acid modification 28 5 1.16 0.00533
156 GO:0018205 peptidyl-lysine modification 18 4 0.74 0.00559
157 GO:0006913 nucleocytoplasmic transport 40 6 1.65 0.00568
158 GO:0051169 nuclear transport 40 6 1.65 0.00568
159 GO:0003006 developmental process involved in reprod... 207 17 8.56 0.00570
160 GO:0008652 cellular amino acid biosynthetic process 261 20 10.80 0.00619
161 GO:0006040 amino sugar metabolic process 29 5 1.20 0.00622
162 GO:0044699 single-organism process 9263 419 383.20 0.00632
163 GO:0009739 response to gibberellin 10 3 0.41 0.00681
164 GO:0009967 positive regulation of signal transducti... 10 3 0.41 0.00681
165 GO:0010647 positive regulation of cell communicatio... 10 3 0.41 0.00681
166 GO:0023056 positive regulation of signaling 10 3 0.41 0.00681
167 GO:0034599 cellular response to oxidative stress 10 3 0.41 0.00681
168 GO:0006448 regulation of translational elongation 19 4 0.79 0.00686
169 GO:0009555 pollen development 19 4 0.79 0.00686
170 GO:0048569 post-embryonic organ development 19 4 0.79 0.00686
171 GO:0006606 protein import into nucleus 30 5 1.24 0.00722
172 GO:0034504 protein localization to nucleus 30 5 1.24 0.00722
173 GO:0044744 protein targeting to nucleus 30 5 1.24 0.00722
174 GO:0051170 nuclear import 30 5 1.24 0.00722
175 GO:1902593 single-organism nuclear import 30 5 1.24 0.00722
176 GO:0010604 positive regulation of macromolecule met... 42 6 1.74 0.00724
177 GO:0031325 positive regulation of cellular metaboli... 42 6 1.74 0.00724
178 GO:0006066 alcohol metabolic process 55 7 2.28 0.00729
179 GO:0046496 nicotinamide nucleotide metabolic proces... 55 7 2.28 0.00729
180 GO:0019362 pyridine nucleotide metabolic process 56 7 2.32 0.00804
181 GO:0055086 nucleobase-containing small molecule met... 493 32 20.39 0.00828
182 GO:0044702 single organism reproductive process 198 16 8.19 0.00833
183 GO:0007275 multicellular organismal development 792 47 32.76 0.00849
184 GO:0006733 oxidoreduction coenzyme metabolic proces... 57 7 2.36 0.00884
185 GO:0002252 immune effector process 11 3 0.46 0.00907
186 GO:0009860 pollen tube growth 11 3 0.46 0.00907
187 GO:0009932 cell tip growth 11 3 0.46 0.00907
188 GO:0010583 response to cyclopentenone 11 3 0.46 0.00907
189 GO:0001934 positive regulation of protein phosphory... 4 2 0.17 0.00970
190 GO:0006986 response to unfolded protein 4 2 0.17 0.00970
191 GO:0009407 toxin catabolic process 4 2 0.17 0.00970
192 GO:0009955 adaxial/abaxial pattern specification 4 2 0.17 0.00970
193 GO:0010021 amylopectin biosynthetic process 4 2 0.17 0.00970
194 GO:0010562 positive regulation of phosphorus metabo... 4 2 0.17 0.00970
195 GO:0030968 endoplasmic reticulum unfolded protein r... 4 2 0.17 0.00970
196 GO:0031401 positive regulation of protein modificat... 4 2 0.17 0.00970
197 GO:0033674 positive regulation of kinase activity 4 2 0.17 0.00970
198 GO:0034620 cellular response to unfolded protein 4 2 0.17 0.00970
199 GO:0035966 response to topologically incorrect prot... 4 2 0.17 0.00970
200 GO:0035967 cellular response to topologically incor... 4 2 0.17 0.00970
201 GO:0042255 ribosome assembly 4 2 0.17 0.00970
202 GO:0042256 mature ribosome assembly 4 2 0.17 0.00970
203 GO:0042327 positive regulation of phosphorylation 4 2 0.17 0.00970
204 GO:0045860 positive regulation of protein kinase ac... 4 2 0.17 0.00970
205 GO:0045937 positive regulation of phosphate metabol... 4 2 0.17 0.00970
206 GO:0051347 positive regulation of transferase activ... 4 2 0.17 0.00970
207 GO:0090487 secondary metabolite catabolic process 4 2 0.17 0.00970
208 GO:2000896 amylopectin metabolic process 4 2 0.17 0.00970
209 GO:1990267 response to transition metal nanoparticl... 21 4 0.87 0.00992
> allRes_MF
GO.ID Term Annotated Significant Expected classicFisher
1 GO:0003735 structural constituent of ribosome 936 114 35.07 2.8e-29
2 GO:0005198 structural molecule activity 1123 119 42.07 4.2e-25
3 GO:0016491 oxidoreductase activity 2342 149 87.74 6.2e-11
4 GO:0015197 peptide transporter activity 9 6 0.34 2.1e-07
5 GO:0015198 oligopeptide transporter activity 9 6 0.34 2.1e-07
6 GO:0004553 hydrolase activity, hydrolyzing O-glycos... 500 41 18.73 2.6e-06
7 GO:0005507 copper ion binding 153 19 5.73 4.8e-06
8 GO:0045309 protein phosphorylated amino acid bindin... 9 5 0.34 8.1e-06
9 GO:0051219 phosphoprotein binding 9 5 0.34 8.1e-06
10 GO:0050660 flavin adenine dinucleotide binding 205 22 7.68 9.8e-06
11 GO:0016798 hydrolase activity, acting on glycosyl b... 536 41 20.08 1.4e-05
12 GO:0019904 protein domain specific binding 19 6 0.71 4.9e-05
13 GO:0016209 antioxidant activity 295 26 11.05 5.3e-05
14 GO:0008237 metallopeptidase activity 140 16 5.25 7.3e-05
15 GO:0043169 cation binding 2574 133 96.44 7.4e-05
16 GO:0003746 translation elongation factor activity 61 10 2.29 8.3e-05
17 GO:0042802 identical protein binding 76 11 2.85 0.00012
18 GO:0008135 translation factor activity, nucleic aci... 226 21 8.47 0.00013
19 GO:0016620 oxidoreductase activity, acting on the a... 66 10 2.47 0.00016
20 GO:0016174 NAD(P)H oxidase activity 4 3 0.15 0.00020
21 GO:0048037 cofactor binding 749 48 28.06 0.00023
22 GO:0016614 oxidoreductase activity, acting on CH-OH... 378 29 14.16 0.00023
23 GO:0005215 transporter activity 1597 86 59.83 0.00044
24 GO:0022857 transmembrane transporter activity 1093 63 40.95 0.00048
25 GO:0016903 oxidoreductase activity, acting on the a... 92 11 3.45 0.00065
26 GO:0046872 metal ion binding 2509 124 94.00 0.00079
27 GO:0004616 phosphogluconate dehydrogenase (decarbox... 31 6 1.16 0.00090
28 GO:0043021 ribonucleoprotein complex binding 21 5 0.79 0.00090
29 GO:0050662 coenzyme binding 559 36 20.94 0.00122
30 GO:0003743 translation initiation factor activity 115 12 4.31 0.00128
31 GO:0004601 peroxidase activity 234 19 8.77 0.00137
32 GO:0016684 oxidoreductase activity, acting on perox... 234 19 8.77 0.00137
33 GO:0046914 transition metal ion binding 1820 93 68.19 0.00137
34 GO:0004028 3-chloroallyl aldehyde dehydrogenase act... 14 4 0.52 0.00145
35 GO:0004645 phosphorylase activity 14 4 0.52 0.00145
36 GO:0016801 hydrolase activity, acting on ether bond... 14 4 0.52 0.00145
37 GO:0008061 chitin binding 25 5 0.94 0.00208
38 GO:0016702 oxidoreductase activity, acting on singl... 63 8 2.36 0.00235
39 GO:0016701 oxidoreductase activity, acting on singl... 78 9 2.92 0.00252
40 GO:0005261 cation channel activity 8 3 0.30 0.00255
41 GO:0005267 potassium channel activity 8 3 0.30 0.00255
42 GO:0016832 aldehyde-lyase activity 27 5 1.01 0.00297
43 GO:0050664 oxidoreductase activity, acting on NAD(P... 39 6 1.46 0.00308
44 GO:0043022 ribosome binding 17 4 0.64 0.00315
45 GO:0070011 peptidase activity, acting on L-amino ac... 810 46 30.35 0.00353
46 GO:0009055 electron carrier activity 725 42 27.16 0.00367
47 GO:0000062 fatty-acyl-CoA binding 9 3 0.34 0.00372
48 GO:0004029 aldehyde dehydrogenase (NAD) activity 9 3 0.34 0.00372
49 GO:0008233 peptidase activity 857 48 32.11 0.00380
50 GO:0005356 hydrogen:glucose symporter activity 3 2 0.11 0.00410
51 GO:0005358 high-affinity hydrogen:glucose symporter... 3 2 0.11 0.00410
52 GO:0009679 hexose:hydrogen symporter activity 3 2 0.11 0.00410
53 GO:0000155 phosphorelay sensor kinase activity 30 5 1.12 0.00477
54 GO:0004568 chitinase activity 30 5 1.12 0.00477
55 GO:0004673 protein histidine kinase activity 30 5 1.12 0.00477
56 GO:0016775 phosphotransferase activity, nitrogenous... 30 5 1.12 0.00477
57 GO:0015085 calcium ion transmembrane transporter ac... 10 3 0.37 0.00516
58 GO:0051920 peroxiredoxin activity 10 3 0.37 0.00516
59 GO:0004175 endopeptidase activity 509 31 19.07 0.00581
60 GO:0022892 substrate-specific transporter activity 845 46 31.66 0.00753
61 GO:0003844 1,4-alpha-glucan branching enzyme activi... 4 2 0.15 0.00800
62 GO:0004055 argininosuccinate synthase activity 4 2 0.15 0.00800
63 GO:0004557 alpha-galactosidase activity 4 2 0.15 0.00800
64 GO:0005355 glucose transmembrane transporter activi... 4 2 0.15 0.00800
65 GO:0015149 hexose transmembrane transporter activit... 4 2 0.15 0.00800
66 GO:0004013 adenosylhomocysteinase activity 12 3 0.45 0.00895
67 GO:0016802 trialkylsulfonium hydrolase activity 12 3 0.45 0.00895
> allRes_CC
GO.ID Term Annotated Significant Expected classicFisher
1 GO:0005829 cytosol 1145 138 60.93 3.0e-21
2 GO:0005840 ribosome 1018 123 54.17 6.3e-19
3 GO:0022626 cytosolic ribosome 242 52 12.88 1.7e-18
4 GO:0071944 cell periphery 1741 173 92.64 8.8e-18
5 GO:0044444 cytoplasmic part 3814 302 202.96 1.5e-17
6 GO:0030529 ribonucleoprotein complex 1064 123 56.62 2.3e-17
7 GO:0005886 plasma membrane 1350 142 71.84 1.8e-16
8 GO:0005737 cytoplasm 4391 331 233.66 2.1e-16
9 GO:0044445 cytosolic part 295 54 15.70 6.3e-16
10 GO:0044391 ribosomal subunit 270 51 14.37 1.1e-15
11 GO:0043228 non-membrane-bounded organelle 1511 146 80.41 8.7e-14
12 GO:0043232 intracellular non-membrane-bounded organ... 1511 146 80.41 8.7e-14
13 GO:0009507 chloroplast 362 56 19.26 3.2e-13
14 GO:0005773 vacuole 558 72 29.69 1.3e-12
15 GO:0022625 cytosolic large ribosomal subunit 109 28 5.80 1.6e-12
16 GO:0015934 large ribosomal subunit 150 31 7.98 4.8e-11
17 GO:0005730 nucleolus 264 40 14.05 1.7e-09
18 GO:0044422 organelle part 1331 118 70.83 8.3e-09
19 GO:0044446 intracellular organelle part 1331 118 70.83 8.3e-09
20 GO:0005576 extracellular region 251 37 13.36 1.5e-08
21 GO:0005618 cell wall 508 58 27.03 2.4e-08
22 GO:0044464 cell part 7609 464 404.90 8.0e-08
23 GO:0030312 external encapsulating structure 540 59 28.74 8.9e-08
24 GO:0009536 plastid 1108 97 58.96 4.2e-07
25 GO:0005623 cell 8085 481 430.23 1.6e-06
26 GO:0022627 cytosolic small ribosomal subunit 97 18 5.16 3.0e-06
27 GO:0032991 macromolecular complex 2267 166 120.64 3.2e-06
28 GO:0015935 small ribosomal subunit 120 20 6.39 4.8e-06
29 GO:0031981 nuclear lumen 369 40 19.64 1.4e-05
30 GO:0043233 organelle lumen 386 40 20.54 3.9e-05
31 GO:0070013 intracellular organelle lumen 386 40 20.54 3.9e-05
32 GO:0031974 membrane-enclosed lumen 391 40 20.81 5.2e-05
33 GO:0044434 chloroplast part 92 15 4.90 9.4e-05
34 GO:0009570 chloroplast stroma 64 12 3.41 0.00012
35 GO:0044435 plastid part 94 15 5.00 0.00012
36 GO:0009532 plastid stroma 66 12 3.51 0.00016
37 GO:0043226 organelle 4917 305 261.65 0.00018
38 GO:0043229 intracellular organelle 4917 305 261.65 0.00018
39 GO:0044428 nuclear part 482 44 25.65 0.00031
40 GO:0009505 plant-type cell wall 29 7 1.54 0.00065
41 GO:0012505 endomembrane system 693 56 36.88 0.00107
42 GO:0005853 eukaryotic translation elongation factor... 24 6 1.28 0.00131
43 GO:0044424 intracellular part 6124 360 325.88 0.00259
44 GO:0048046 apoplast 69 10 3.67 0.00336
45 GO:0016020 membrane 4537 274 241.43 0.00341
46 GO:0005834 heterotrimeric G-protein complex 21 5 1.12 0.00419
47 GO:0019897 extrinsic component of plasma membrane 21 5 1.12 0.00419
48 GO:0031234 extrinsic component of cytoplasmic side ... 21 5 1.12 0.00419
49 GO:0044437 vacuolar part 32 6 1.70 0.00613
50 GO:0005739 mitochondrion 548 43 29.16 0.00666

## Sheet: Root
> allRes_BP
GO.ID Term Annotated Significant Expected classicFisher
1 GO:0006412 translation 1379 137 53.45 4.4e-25
2 GO:0010035 response to inorganic substance 228 36 8.84 6.6e-13
3 GO:0042221 response to chemical 428 51 16.59 1.0e-12
4 GO:1901700 response to oxygen-containing compound 137 27 5.31 2.5e-12
5 GO:0010038 response to metal ion 178 30 6.90 1.0e-11
6 GO:0046686 response to cadmium ion 141 25 5.47 1.8e-10
7 GO:0070887 cellular response to chemical stimulus 56 16 2.17 2.2e-10
8 GO:0009628 response to abiotic stimulus 874 72 33.88 1.3e-09
9 GO:0071310 cellular response to organic substance 46 13 1.78 1.3e-08
10 GO:0009755 hormone-mediated signaling pathway 39 12 1.51 1.6e-08
11 GO:0032870 cellular response to hormone stimulus 39 12 1.51 1.6e-08
12 GO:0071495 cellular response to endogenous stimulus 39 12 1.51 1.6e-08
13 GO:0001101 response to acid 98 18 3.80 3.6e-08
14 GO:0005975 carbohydrate metabolic process 1285 89 49.81 6.3e-08
15 GO:0010467 gene expression 3942 212 152.79 1.0e-07
16 GO:0006970 response to osmotic stress 128 19 4.96 5.0e-07
17 GO:1901701 cellular response to oxygen-containing c... 44 11 1.71 6.6e-07
18 GO:0009651 response to salt stress 122 18 4.73 1.1e-06
19 GO:0055114 oxidation-reduction process 2134 124 82.71 2.4e-06
20 GO:0010033 response to organic substance 169 21 6.55 2.5e-06
21 GO:0072593 reactive oxygen species metabolic proces... 26 8 1.01 4.1e-06
22 GO:0010941 regulation of cell death 14 6 0.54 7.6e-06
23 GO:0043067 regulation of programmed cell death 14 6 0.54 7.6e-06
24 GO:0006414 translational elongation 90 14 3.49 9.0e-06
25 GO:0071396 cellular response to lipid 21 7 0.81 9.2e-06
26 GO:0044724 single-organism carbohydrate catabolic p... 160 19 6.20 1.5e-05
27 GO:0016052 carbohydrate catabolic process 175 20 6.78 1.6e-05
28 GO:0043069 negative regulation of programmed cell d... 10 5 0.39 1.9e-05
29 GO:0060548 negative regulation of cell death 10 5 0.39 1.9e-05
30 GO:0044710 single-organism metabolic process 4806 236 186.28 2.0e-05
31 GO:0042254 ribosome biogenesis 137 17 5.31 2.3e-05
32 GO:0050896 response to stimulus 3236 168 125.42 2.8e-05
33 GO:0048518 positive regulation of biological proces... 64 11 2.48 3.1e-05
34 GO:0022613 ribonucleoprotein complex biogenesis 141 17 5.47 3.3e-05
35 GO:0043207 response to external biotic stimulus 76 12 2.95 3.4e-05
36 GO:0051707 response to other organism 76 12 2.95 3.4e-05
37 GO:0006952 defense response 89 13 3.45 3.7e-05
38 GO:0071229 cellular response to acid 26 7 1.01 4.4e-05
39 GO:0097306 cellular response to alcohol 19 6 0.74 5.9e-05
40 GO:0033993 response to lipid 57 10 2.21 6.0e-05
41 GO:0055085 transmembrane transport 1106 69 42.87 6.5e-05
42 GO:0009056 catabolic process 975 62 37.79 9.0e-05
43 GO:0098542 defense response to other organism 60 10 2.33 9.4e-05
44 GO:0044249 cellular biosynthetic process 4348 212 168.52 0.00010
45 GO:0044036 cell wall macromolecule metabolic proces... 50 9 1.94 0.00011
46 GO:1901576 organic substance biosynthetic process 4495 217 174.22 0.00015
47 GO:0009617 response to bacterium 52 9 2.02 0.00016
48 GO:0009266 response to temperature stimulus 77 11 2.98 0.00018
49 GO:0048522 positive regulation of cellular process 53 9 2.05 0.00018
50 GO:0009738 abscisic acid-activated signaling pathwa... 15 5 0.58 0.00019
51 GO:0071215 cellular response to abscisic acid stimu... 15 5 0.58 0.00019
52 GO:0048731 system development 258 23 10.00 0.00019
53 GO:0009313 oligosaccharide catabolic process 4 3 0.16 0.00023
54 GO:0046352 disaccharide catabolic process 4 3 0.16 0.00023
55 GO:0097305 response to alcohol 55 9 2.13 0.00024
56 GO:0048513 organ development 80 11 3.10 0.00025
57 GO:0009059 macromolecule biosynthetic process 3541 175 137.25 0.00026
58 GO:0044085 cellular component biogenesis 352 28 13.64 0.00028
59 GO:0016998 cell wall macromolecule catabolic proces... 45 8 1.74 0.00030
60 GO:0009605 response to external stimulus 217 20 8.41 0.00031
61 GO:0050832 defense response to fungus 17 5 0.66 0.00036
62 GO:0010119 regulation of stomatal movement 10 4 0.39 0.00039
63 GO:0044275 cellular carbohydrate catabolic process 10 4 0.39 0.00039
64 GO:0034645 cellular macromolecule biosynthetic proc... 3527 173 136.70 0.00041
65 GO:0000160 phosphorelay signal transduction system 60 9 2.33 0.00047
66 GO:0009620 response to fungus 18 5 0.70 0.00049
67 GO:0006950 response to stress 1934 103 74.96 0.00054
68 GO:0009737 response to abscisic acid 49 8 1.90 0.00054
69 GO:0009873 ethylene-activated signaling pathway 5 3 0.19 0.00055
70 GO:0071369 cellular response to ethylene stimulus 5 3 0.19 0.00055
71 GO:0071554 cell wall organization or biogenesis 74 10 2.87 0.00055
72 GO:0006979 response to oxidative stress 227 20 8.80 0.00056
73 GO:0044712 single-organism catabolic process 370 28 14.34 0.00061
74 GO:0051130 positive regulation of cellular componen... 19 5 0.74 0.00064
75 GO:0050790 regulation of catalytic activity 181 17 7.02 0.00070
76 GO:0010154 fruit development 64 9 2.48 0.00077
77 GO:0006801 superoxide metabolic process 20 5 0.78 0.00082
78 GO:0006007 glucose catabolic process 152 15 5.89 0.00085
79 GO:0019320 hexose catabolic process 152 15 5.89 0.00085
80 GO:0046365 monosaccharide catabolic process 152 15 5.89 0.00085
81 GO:0009812 flavonoid metabolic process 12 4 0.47 0.00086
82 GO:0009725 response to hormone 137 14 5.31 0.00089
83 GO:0065009 regulation of molecular function 185 17 7.17 0.00089
84 GO:0007155 cell adhesion 21 5 0.81 0.00105
85 GO:0022610 biological adhesion 21 5 0.81 0.00105
86 GO:0006098 pentose-phosphate shunt 42 7 1.63 0.00106
87 GO:0006739 NADP metabolic process 42 7 1.63 0.00106
88 GO:0006740 NADPH regeneration 42 7 1.63 0.00106
89 GO:0042742 defense response to bacterium 42 7 1.63 0.00106
90 GO:0009225 nucleotide-sugar metabolic process 6 3 0.23 0.00106
91 GO:0042743 hydrogen peroxide metabolic process 6 3 0.23 0.00106
92 GO:0032270 positive regulation of cellular protein ... 31 6 1.20 0.00107
93 GO:0051247 positive regulation of protein metabolic... 31 6 1.20 0.00107
94 GO:0044765 single-organism transport 1684 90 65.27 0.00110
95 GO:0010118 stomatal movement 13 4 0.50 0.00121
96 GO:0009607 response to biotic stimulus 332 25 12.87 0.00126
97 GO:0000302 response to reactive oxygen species 22 5 0.85 0.00131
98 GO:0009415 response to water 44 7 1.71 0.00140
99 GO:0043086 negative regulation of catalytic activit... 70 9 2.71 0.00148
100 GO:0005988 lactose metabolic process 2 2 0.08 0.00150
101 GO:0005990 lactose catabolic process 2 2 0.08 0.00150
102 GO:0009226 nucleotide-sugar biosynthetic process 2 2 0.08 0.00150
103 GO:0010253 UDP-rhamnose biosynthetic process 2 2 0.08 0.00150
104 GO:0033478 UDP-rhamnose metabolic process 2 2 0.08 0.00150
105 GO:0006730 one-carbon metabolic process 14 4 0.54 0.00164
106 GO:0005996 monosaccharide metabolic process 231 19 8.95 0.00172
107 GO:0044092 negative regulation of molecular functio... 72 9 2.79 0.00181
108 GO:0006984 ER-nucleus signaling pathway 7 3 0.27 0.00181
109 GO:0009893 positive regulation of metabolic process 46 7 1.78 0.00183
110 GO:0019318 hexose metabolic process 215 18 8.33 0.00185
111 GO:0048316 seed development 59 8 2.29 0.00190
112 GO:0009058 biosynthetic process 5245 239 203.29 0.00197
113 GO:0009743 response to carbohydrate 24 5 0.93 0.00199
114 GO:1901615 organic hydroxy compound metabolic proce... 73 9 2.83 0.00199
115 GO:0009409 response to cold 60 8 2.33 0.00211
116 GO:0009749 response to glucose 15 4 0.58 0.00217
117 GO:0048584 positive regulation of response to stimu... 15 4 0.58 0.00217
118 GO:0009793 embryo development ending in seed dorman... 48 7 1.86 0.00236
119 GO:0014070 response to organic cyclic compound 25 5 0.97 0.00240
120 GO:0051179 localization 2443 121 94.69 0.00256
121 GO:0006006 glucose metabolic process 171 15 6.63 0.00275
122 GO:0009612 response to mechanical stimulus 8 3 0.31 0.00281
123 GO:0009740 gibberellic acid mediated signaling path... 8 3 0.31 0.00281
124 GO:0010476 gibberellin mediated signaling pathway 8 3 0.31 0.00281
125 GO:0071370 cellular response to gibberellin stimulu... 8 3 0.31 0.00281
126 GO:0009746 response to hexose 16 4 0.62 0.00281
127 GO:0009845 seed germination 16 4 0.62 0.00281
128 GO:0034284 response to monosaccharide 16 4 0.62 0.00281
129 GO:0034976 response to endoplasmic reticulum stress 16 4 0.62 0.00281
130 GO:0090351 seedling development 16 4 0.62 0.00281
131 GO:0006471 protein ADP-ribosylation 26 5 1.01 0.00288
132 GO:0003006 developmental process involved in reprod... 207 17 8.02 0.00298
133 GO:0048523 negative regulation of cellular process 50 7 1.94 0.00299
134 GO:0051128 regulation of cellular component organiz... 38 6 1.47 0.00318
135 GO:0055086 nucleobase-containing small molecule met... 493 32 19.11 0.00324
136 GO:0006810 transport 2391 118 92.67 0.00327
137 GO:0051234 establishment of localization 2397 118 92.91 0.00355
138 GO:0006449 regulation of translational termination 17 4 0.66 0.00356
139 GO:0006452 translational frameshifting 17 4 0.66 0.00356
140 GO:0008612 peptidyl-lysine modification to hypusine 17 4 0.66 0.00356
141 GO:0009723 response to ethylene 17 4 0.66 0.00356
142 GO:0043243 positive regulation of protein complex d... 17 4 0.66 0.00356
143 GO:0043244 regulation of protein complex disassembl... 17 4 0.66 0.00356
144 GO:0045901 positive regulation of translational elo... 17 4 0.66 0.00356
145 GO:0045905 positive regulation of translational ter... 17 4 0.66 0.00356
146 GO:0046516 hypusine metabolic process 17 4 0.66 0.00356
147 GO:0002376 immune system process 28 5 1.09 0.00404
148 GO:0018193 peptidyl-amino acid modification 28 5 1.09 0.00404
149 GO:0009404 toxin metabolic process 9 3 0.35 0.00409
150 GO:0009914 hormone transport 9 3 0.35 0.00409
151 GO:0034614 cellular response to reactive oxygen spe... 9 3 0.35 0.00409
152 GO:0060918 auxin transport 9 3 0.35 0.00409
153 GO:0006913 nucleocytoplasmic transport 40 6 1.55 0.00414
154 GO:0051169 nuclear transport 40 6 1.55 0.00414
155 GO:0002679 respiratory burst involved in defense re... 3 2 0.12 0.00439
156 GO:0045730 respiratory burst 3 2 0.12 0.00439
157 GO:0050665 hydrogen peroxide biosynthetic process 3 2 0.12 0.00439
158 GO:0052542 defense response by callose deposition 3 2 0.12 0.00439
159 GO:0018205 peptidyl-lysine modification 18 4 0.70 0.00444
160 GO:0044702 single organism reproductive process 198 16 7.67 0.00456
161 GO:0006040 amino sugar metabolic process 29 5 1.12 0.00473
162 GO:0006066 alcohol metabolic process 55 7 2.13 0.00515
163 GO:0046496 nicotinamide nucleotide metabolic proces... 55 7 2.13 0.00515
164 GO:0010604 positive regulation of macromolecule met... 42 6 1.63 0.00530
165 GO:0031325 positive regulation of cellular metaboli... 42 6 1.63 0.00530
166 GO:0006448 regulation of translational elongation 19 4 0.74 0.00545
167 GO:0009555 pollen development 19 4 0.74 0.00545
168 GO:0048569 post-embryonic organ development 19 4 0.74 0.00545
169 GO:0006606 protein import into nucleus 30 5 1.16 0.00550
170 GO:0034504 protein localization to nucleus 30 5 1.16 0.00550
171 GO:0044744 protein targeting to nucleus 30 5 1.16 0.00550
172 GO:0051170 nuclear import 30 5 1.16 0.00550
173 GO:1902593 single-organism nuclear import 30 5 1.16 0.00550
174 GO:0009739 response to gibberellin 10 3 0.39 0.00567
175 GO:0009813 flavonoid biosynthetic process 10 3 0.39 0.00567
176 GO:0009967 positive regulation of signal transducti... 10 3 0.39 0.00567
177 GO:0010647 positive regulation of cell communicatio... 10 3 0.39 0.00567
178 GO:0023056 positive regulation of signaling 10 3 0.39 0.00567
179 GO:0034599 cellular response to oxidative stress 10 3 0.39 0.00567
180 GO:0019362 pyridine nucleotide metabolic process 56 7 2.17 0.00569
181 GO:0048856 anatomical structure development 638 38 24.73 0.00598
182 GO:0006733 oxidoreduction coenzyme metabolic proces... 57 7 2.21 0.00627
183 GO:0008652 cellular amino acid biosynthetic process 261 19 10.12 0.00655
184 GO:0044281 small molecule metabolic process 1363 71 52.83 0.00669
185 GO:0042451 purine nucleoside biosynthetic process 171 14 6.63 0.00686
186 GO:0046129 purine ribonucleoside biosynthetic proce... 171 14 6.63 0.00686
187 GO:0022622 root system development 45 6 1.74 0.00747
188 GO:0048364 root development 45 6 1.74 0.00747
189 GO:0072594 establishment of protein localization to... 59 7 2.29 0.00758
190 GO:0002252 immune effector process 11 3 0.43 0.00758
191 GO:0009860 pollen tube growth 11 3 0.43 0.00758
192 GO:0009932 cell tip growth 11 3 0.43 0.00758
193 GO:0010583 response to cyclopentenone 11 3 0.43 0.00758
194 GO:1990267 response to transition metal nanoparticl... 21 4 0.81 0.00792
195 GO:0001934 positive regulation of protein phosphory... 4 2 0.16 0.00855
196 GO:0006986 response to unfolded protein 4 2 0.16 0.00855
197 GO:0009407 toxin catabolic process 4 2 0.16 0.00855
198 GO:0009955 adaxial/abaxial pattern specification 4 2 0.16 0.00855
199 GO:0010021 amylopectin biosynthetic process 4 2 0.16 0.00855
200 GO:0010562 positive regulation of phosphorus metabo... 4 2 0.16 0.00855
201 GO:0030968 endoplasmic reticulum unfolded protein r... 4 2 0.16 0.00855
202 GO:0031401 positive regulation of protein modificat... 4 2 0.16 0.00855
203 GO:0033674 positive regulation of kinase activity 4 2 0.16 0.00855
204 GO:0034620 cellular response to unfolded protein 4 2 0.16 0.00855
205 GO:0035966 response to topologically incorrect prot... 4 2 0.16 0.00855
206 GO:0035967 cellular response to topologically incor... 4 2 0.16 0.00855
207 GO:0042255 ribosome assembly 4 2 0.16 0.00855
208 GO:0042256 mature ribosome assembly 4 2 0.16 0.00855
209 GO:0042327 positive regulation of phosphorylation 4 2 0.16 0.00855
210 GO:0045860 positive regulation of protein kinase ac... 4 2 0.16 0.00855
211 GO:0045937 positive regulation of phosphate metabol... 4 2 0.16 0.00855
212 GO:0051347 positive regulation of transferase activ... 4 2 0.16 0.00855
213 GO:0090487 secondary metabolite catabolic process 4 2 0.16 0.00855
214 GO:2000896 amylopectin metabolic process 4 2 0.16 0.00855
215 GO:0009163 nucleoside biosynthetic process 177 14 6.86 0.00918
216 GO:0042455 ribonucleoside biosynthetic process 177 14 6.86 0.00918
217 GO:0006570 tyrosine metabolic process 12 3 0.47 0.00982
218 GO:0048588 developmental cell growth 12 3 0.47 0.00982
> allRes_MF
GO.ID Term Annotated Significant Expected classicFisher
1 GO:0003735 structural constituent of ribosome 936 114 32.65 < 1e-30
2 GO:0005198 structural molecule activity 1123 119 39.18 7.0e-28
3 GO:0016491 oxidoreductase activity 2342 135 81.71 3.1e-09
4 GO:0015197 peptide transporter activity 9 6 0.31 1.4e-07
5 GO:0015198 oligopeptide transporter activity 9 6 0.31 1.4e-07
6 GO:0005507 copper ion binding 153 19 5.34 1.7e-06
7 GO:0004553 hydrolase activity, hydrolyzing O-glycos... 500 39 17.44 2.8e-06
8 GO:0050660 flavin adenine dinucleotide binding 205 22 7.15 3.2e-06
9 GO:0045309 protein phosphorylated amino acid bindin... 9 5 0.31 5.7e-06
10 GO:0051219 phosphoprotein binding 9 5 0.31 5.7e-06
11 GO:0016798 hydrolase activity, acting on glycosyl b... 536 39 18.70 1.4e-05
12 GO:0016209 antioxidant activity 295 26 10.29 1.6e-05
13 GO:0008237 metallopeptidase activity 140 16 4.88 3.2e-05
14 GO:0019904 protein domain specific binding 19 6 0.66 3.3e-05
15 GO:0003746 translation elongation factor activity 61 10 2.13 4.6e-05
16 GO:0008135 translation factor activity, nucleic aci... 226 21 7.88 4.7e-05
17 GO:0042802 identical protein binding 76 11 2.65 6.3e-05
18 GO:0016620 oxidoreductase activity, acting on the a... 66 10 2.30 9.1e-05
19 GO:0016174 NAD(P)H oxidase activity 4 3 0.14 0.00016
20 GO:0016903 oxidoreductase activity, acting on the a... 92 11 3.21 0.00036
21 GO:0016614 oxidoreductase activity, acting on CH-OH... 378 27 13.19 0.00038
22 GO:0043169 cation binding 2574 121 89.80 0.00040
23 GO:0005215 transporter activity 1597 81 55.71 0.00045
24 GO:0046914 transition metal ion binding 1820 90 63.49 0.00050
25 GO:0048037 cofactor binding 749 44 26.13 0.00057
26 GO:0004601 peroxidase activity 234 19 8.16 0.00059
27 GO:0016684 oxidoreductase activity, acting on perox... 234 19 8.16 0.00059
28 GO:0004616 phosphogluconate dehydrogenase (decarbox... 31 6 1.08 0.00062
29 GO:0043021 ribonucleoprotein complex binding 21 5 0.73 0.00065
30 GO:0050662 coenzyme binding 559 35 19.50 0.00068
31 GO:0003743 translation initiation factor activity 115 12 4.01 0.00069
32 GO:0022857 transmembrane transporter activity 1093 58 38.13 0.00104
33 GO:0004028 3-chloroallyl aldehyde dehydrogenase act... 14 4 0.49 0.00111
34 GO:0004645 phosphorylase activity 14 4 0.49 0.00111
35 GO:0016801 hydrolase activity, acting on ether bond... 14 4 0.49 0.00111
36 GO:0070011 peptidase activity, acting on L-amino ac... 810 45 28.26 0.00154
37 GO:0008233 peptidase activity 857 47 29.90 0.00158
38 GO:0009055 electron carrier activity 725 41 25.29 0.00177
39 GO:0004175 endopeptidase activity 509 31 17.76 0.00205
40 GO:0005261 cation channel activity 8 3 0.28 0.00208
41 GO:0005267 potassium channel activity 8 3 0.28 0.00208
42 GO:0050664 oxidoreductase activity, acting on NAD(P... 39 6 1.36 0.00216
43 GO:0016832 aldehyde-lyase activity 27 5 0.94 0.00218
44 GO:0043022 ribosome binding 17 4 0.59 0.00243
45 GO:0000062 fatty-acyl-CoA binding 9 3 0.31 0.00304
46 GO:0004029 aldehyde dehydrogenase (NAD) activity 9 3 0.31 0.00304
47 GO:0000155 phosphorelay sensor kinase activity 30 5 1.05 0.00352
48 GO:0004568 chitinase activity 30 5 1.05 0.00352
49 GO:0004673 protein histidine kinase activity 30 5 1.05 0.00352
50 GO:0016775 phosphotransferase activity, nitrogenous... 30 5 1.05 0.00352
51 GO:0005356 hydrogen:glucose symporter activity 3 2 0.10 0.00356
52 GO:0005358 high-affinity hydrogen:glucose symporter... 3 2 0.10 0.00356
53 GO:0009679 hexose:hydrogen symporter activity 3 2 0.10 0.00356
54 GO:0046872 metal ion binding 2509 112 87.53 0.00376
55 GO:0015085 calcium ion transmembrane transporter ac... 10 3 0.35 0.00422
56 GO:0051920 peroxiredoxin activity 10 3 0.35 0.00422
57 GO:0005525 GTP binding 484 28 16.89 0.00657
58 GO:0032561 guanyl ribonucleotide binding 484 28 16.89 0.00657
59 GO:0003844 1,4-alpha-glucan branching enzyme activi... 4 2 0.14 0.00696
60 GO:0004055 argininosuccinate synthase activity 4 2 0.14 0.00696
61 GO:0004557 alpha-galactosidase activity 4 2 0.14 0.00696
62 GO:0005355 glucose transmembrane transporter activi... 4 2 0.14 0.00696
63 GO:0015149 hexose transmembrane transporter activit... 4 2 0.14 0.00696
64 GO:0019001 guanyl nucleotide binding 488 28 17.02 0.00732
65 GO:0004013 adenosylhomocysteinase activity 12 3 0.42 0.00735
66 GO:0016802 trialkylsulfonium hydrolase activity 12 3 0.42 0.00735
67 GO:0016651 oxidoreductase activity, acting on NAD(P... 100 9 3.49 0.00826
68 GO:0008172 S-methyltransferase activity 24 4 0.84 0.00896
69 GO:0022892 substrate-specific transporter activity 845 43 29.48 0.00898
70 GO:0004784 superoxide dismutase activity 13 3 0.45 0.00931
71 GO:0016721 oxidoreductase activity, acting on super... 13 3 0.45 0.00931
> allRes_CC
GO.ID Term Annotated Significant Expected classicFisher
1 GO:0005829 cytosol 1145 138 57.76 1.5e-23
2 GO:0005840 ribosome 1018 123 51.36 6.0e-21
3 GO:0044444 cytoplasmic part 3814 298 192.41 1.6e-20
4 GO:0022626 cytosolic ribosome 242 52 12.21 1.6e-19
5 GO:0030529 ribonucleoprotein complex 1064 123 53.68 2.6e-19
6 GO:0071944 cell periphery 1741 169 87.83 8.6e-19
7 GO:0005737 cytoplasm 4391 324 221.52 8.8e-19
8 GO:0005886 plasma membrane 1350 139 68.11 2.2e-17
9 GO:0044445 cytosolic part 295 54 14.88 6.2e-17
10 GO:0044391 ribosomal subunit 270 51 13.62 1.2e-16
11 GO:0043228 non-membrane-bounded organelle 1511 145 76.23 1.8e-15
12 GO:0043232 intracellular non-membrane-bounded organ... 1511 145 76.23 1.8e-15
13 GO:0009507 chloroplast 362 56 18.26 3.4e-14
14 GO:0022625 cytosolic large ribosomal subunit 109 28 5.50 4.4e-13
15 GO:0005773 vacuole 558 70 28.15 8.2e-13
16 GO:0015934 large ribosomal subunit 150 31 7.57 1.2e-11
17 GO:0044422 organelle part 1331 118 67.15 3.0e-10
18 GO:0044446 intracellular organelle part 1331 118 67.15 3.0e-10
19 GO:0005730 nucleolus 264 40 13.32 3.5e-10
20 GO:0044464 cell part 7609 451 383.87 3.8e-10
21 GO:0005618 cell wall 508 58 25.63 3.4e-09
22 GO:0005576 extracellular region 251 37 12.66 3.5e-09
23 GO:0030312 external encapsulating structure 540 58 27.24 3.2e-08
24 GO:0005623 cell 8085 464 407.88 5.2e-08
25 GO:0032991 macromolecular complex 2267 166 114.37 8.1e-08
26 GO:0009536 plastid 1108 95 55.90 1.2e-07
27 GO:0022627 cytosolic small ribosomal subunit 97 18 4.89 1.4e-06
28 GO:0015935 small ribosomal subunit 120 20 6.05 2.1e-06
29 GO:0031981 nuclear lumen 369 40 18.62 3.8e-06
30 GO:0043233 organelle lumen 386 40 19.47 1.1e-05
31 GO:0070013 intracellular organelle lumen 386 40 19.47 1.1e-05
32 GO:0043226 organelle 4917 298 248.06 1.2e-05
33 GO:0043229 intracellular organelle 4917 298 248.06 1.2e-05
34 GO:0031974 membrane-enclosed lumen 391 40 19.73 1.6e-05
35 GO:0044434 chloroplast part 92 15 4.64 5.2e-05
36 GO:0044435 plastid part 94 15 4.74 6.7e-05
37 GO:0009570 chloroplast stroma 64 12 3.23 7.2e-05
38 GO:0044428 nuclear part 482 44 24.32 9.4e-05
39 GO:0009532 plastid stroma 66 12 3.33 9.8e-05
40 GO:0044424 intracellular part 6124 351 308.95 0.00019
41 GO:0012505 endomembrane system 693 56 34.96 0.00029
42 GO:0009505 plant-type cell wall 29 7 1.46 0.00047
43 GO:0005853 eukaryotic translation elongation factor... 24 6 1.21 0.00099
44 GO:0048046 apoplast 69 10 3.48 0.00228
45 GO:0005739 mitochondrion 548 43 27.65 0.00257
46 GO:0005622 intracellular 6692 370 337.61 0.00291
47 GO:0005834 heterotrimeric G-protein complex 21 5 1.06 0.00333
48 GO:0019897 extrinsic component of plasma membrane 21 5 1.06 0.00333
49 GO:0031234 extrinsic component of cytoplasmic side ... 21 5 1.06 0.00333
50 GO:0044437 vacuolar part 32 6 1.61 0.00474
51 GO:0016020 membrane 4537 259 228.89 0.00520
52 GO:0044459 plasma membrane part 108 12 5.45 0.00813
53 GO:0009941 chloroplast envelope 47 7 2.37 0.00871
